# Supplementary material for: Comprehensive structure–property–function correlation in three hybrid Bi( iii ) and Sb( iii ) metal halide compounds based on 4-ethylaminomethylpyridine: comparative insights into optical, dielectric, and antibiological activities
Source: Royal Society of Chemistry journal article supplement (doi:10.1039/d5ma01261a), 2026-01-01
Supplement: d5ma01261a1.pdf [file d5ma01261a1.pdf]

## Supplementary

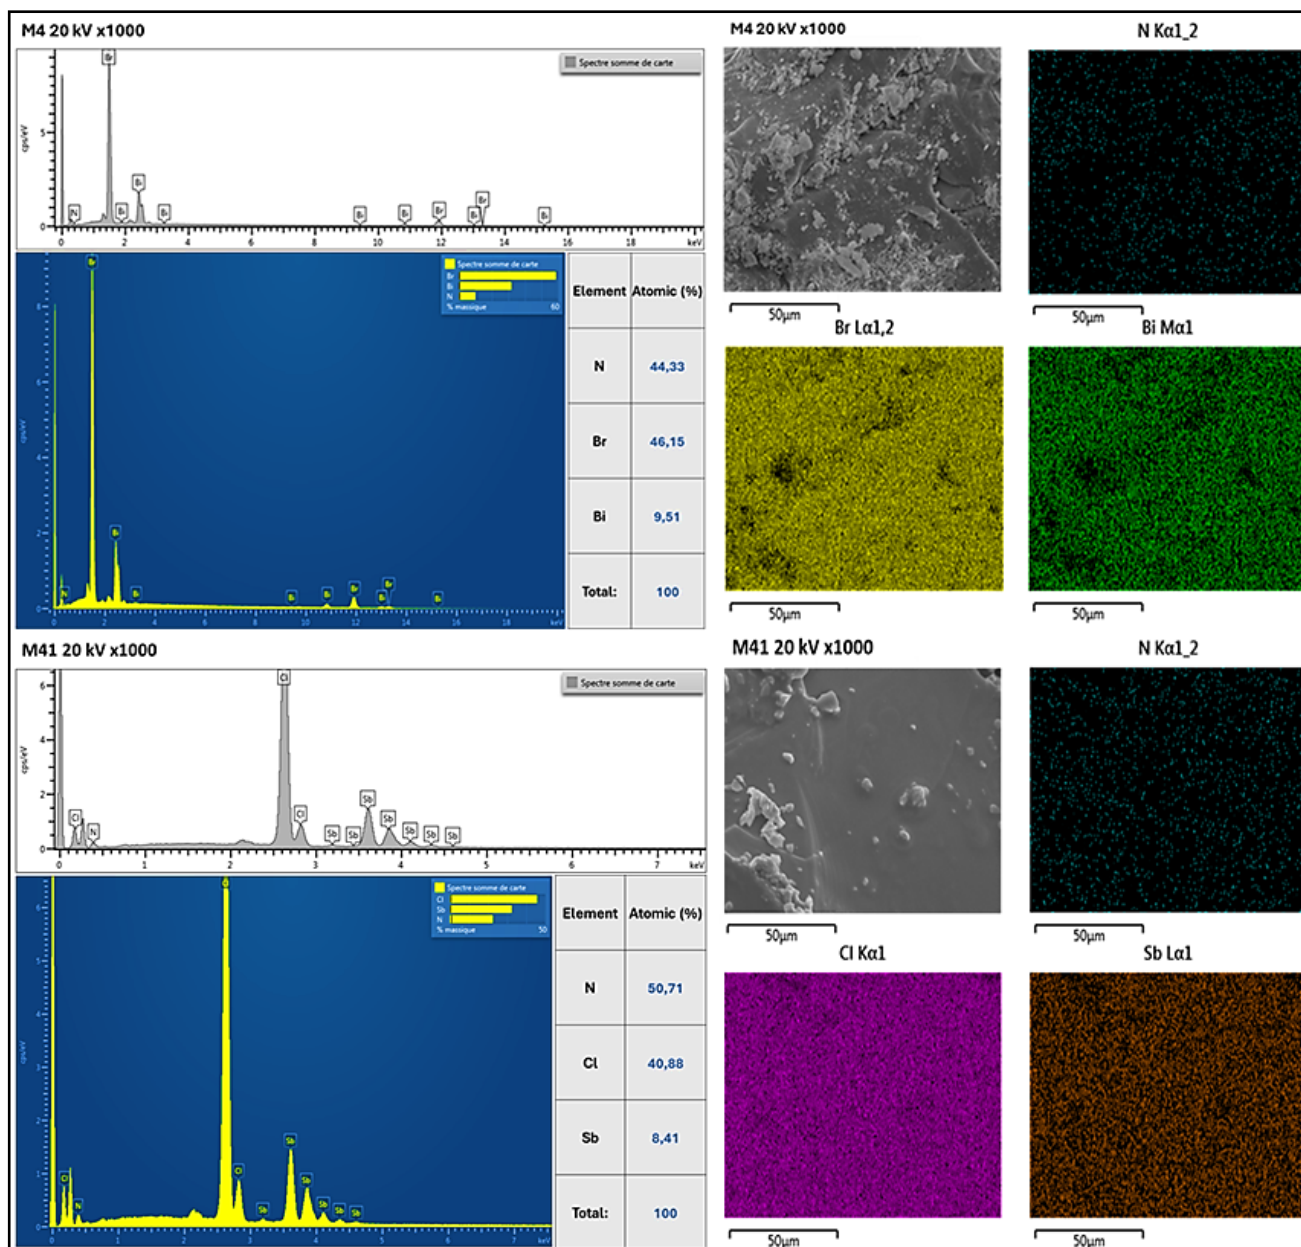

**Fig. 1.S:** EDS spectrum and elemental mapping of M4 and M41 compounds

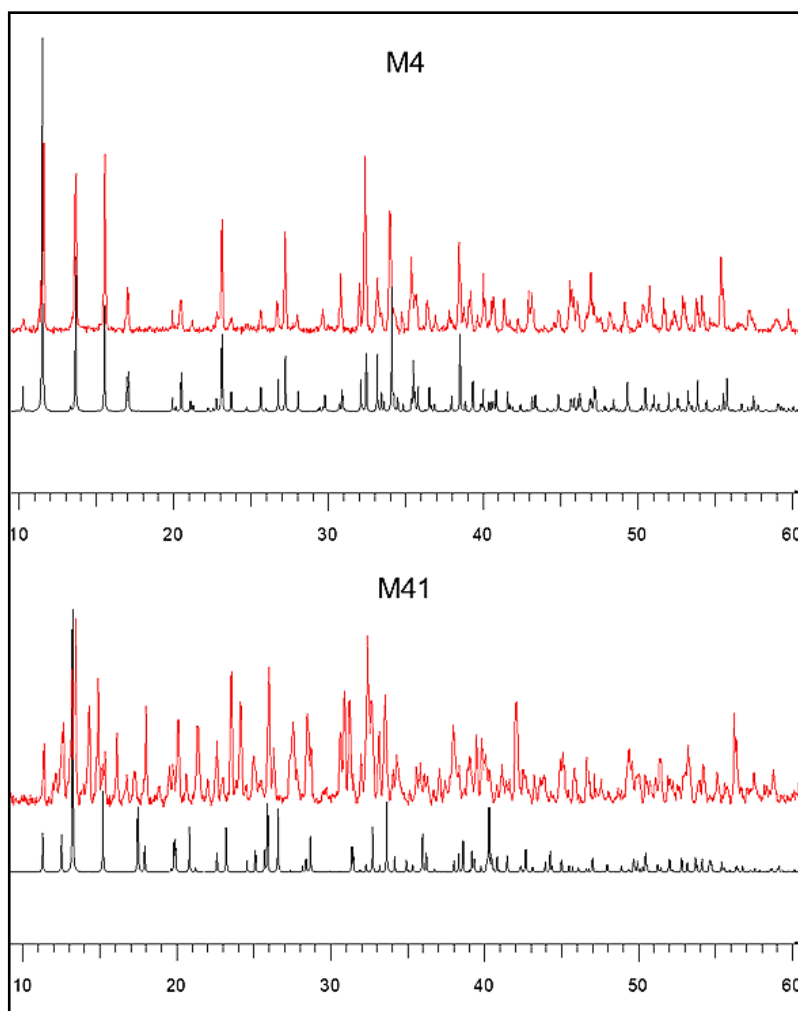

**Fig. 2.S:** PXRD pattern with experimental (red) and simulated (black) data of M4 and M41 compounds

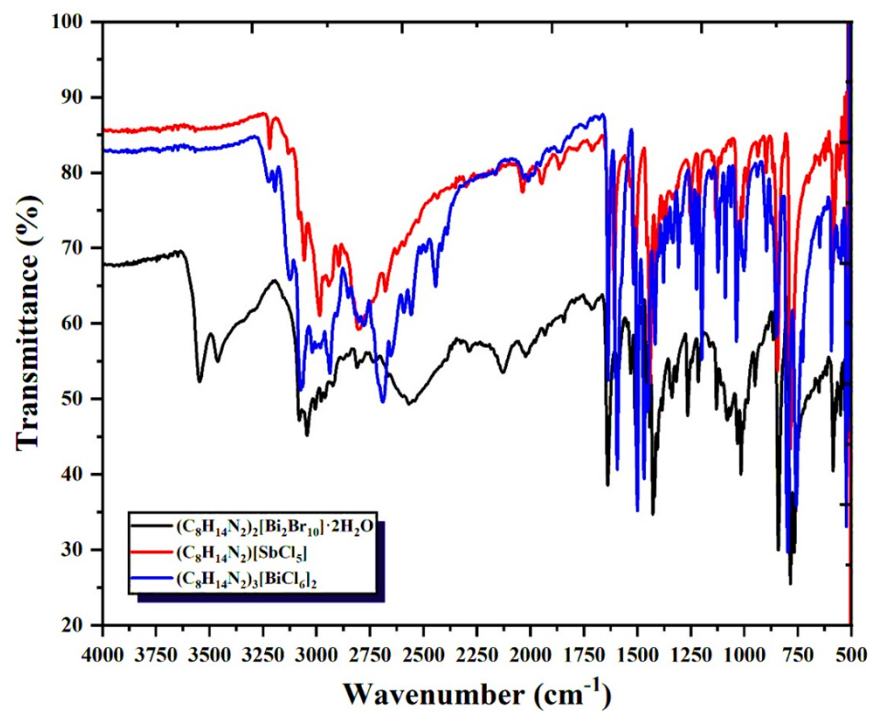

**Fig. 3.S:** Comparative FTIR Spectra of the three compounds

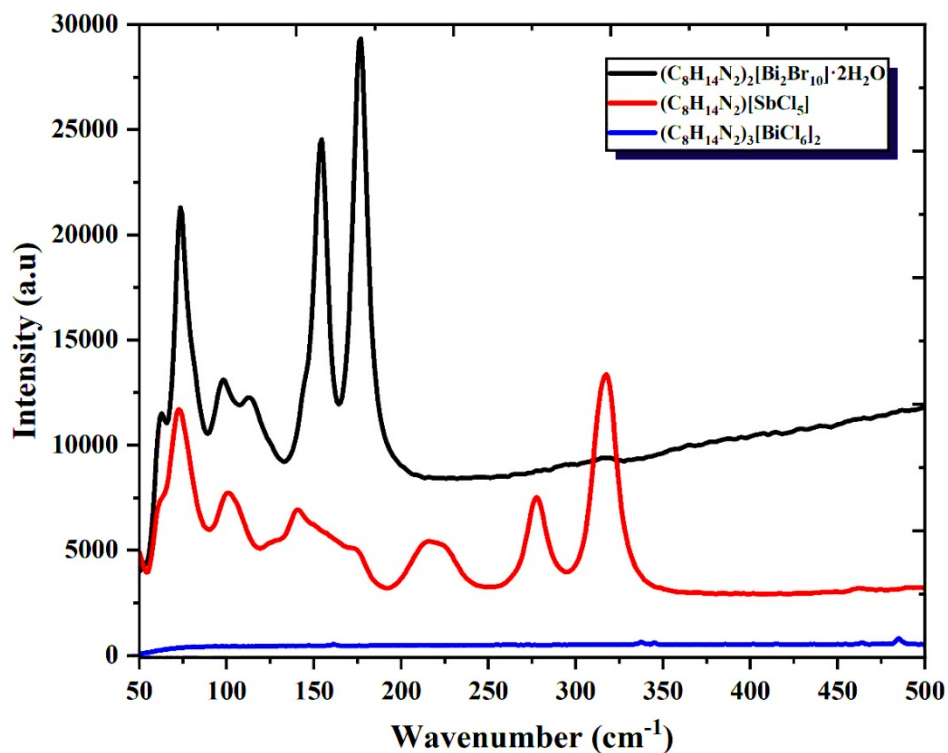

Fig. 4.S: Comparative Raman Spectra of the three compounds

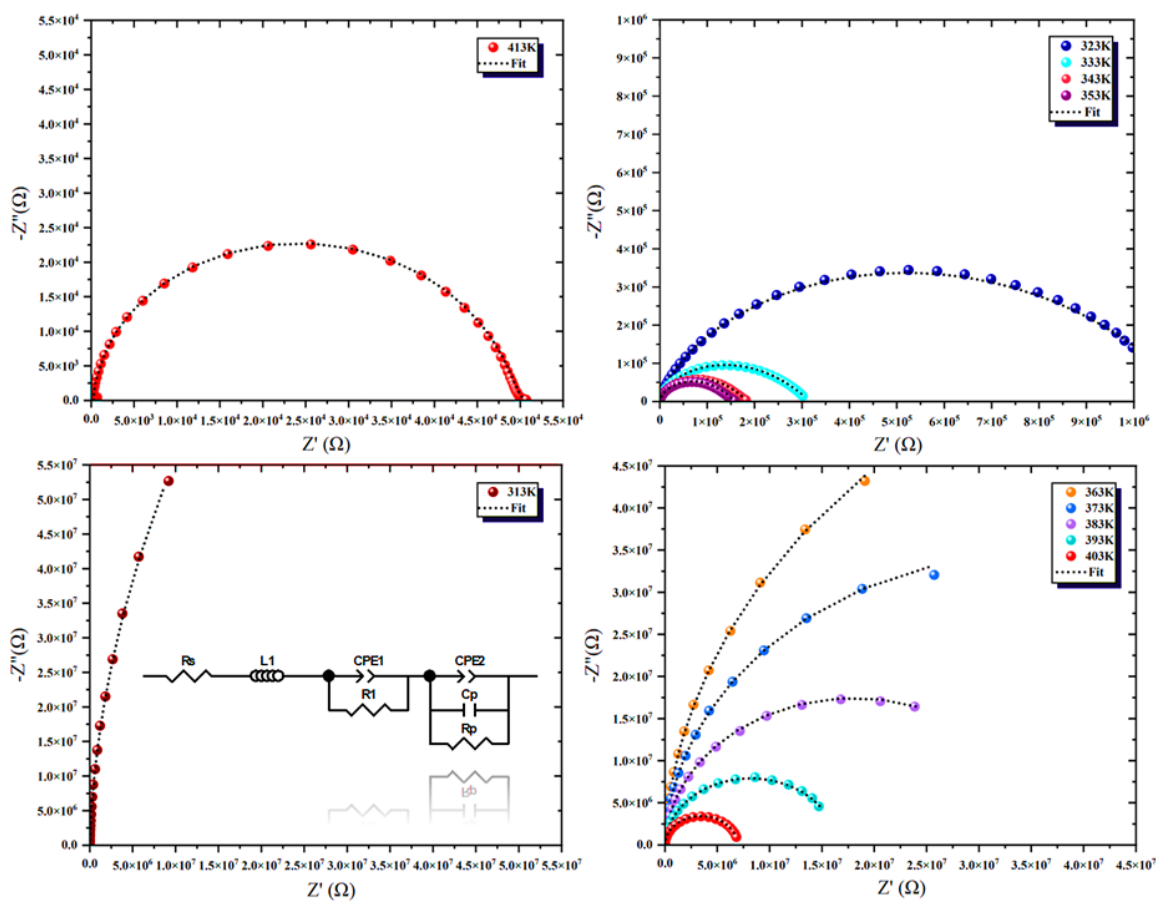

Fig. 5.S: Nyquist Plots at Different Temperatures ( $-Z''$  vs  $Z'$ )

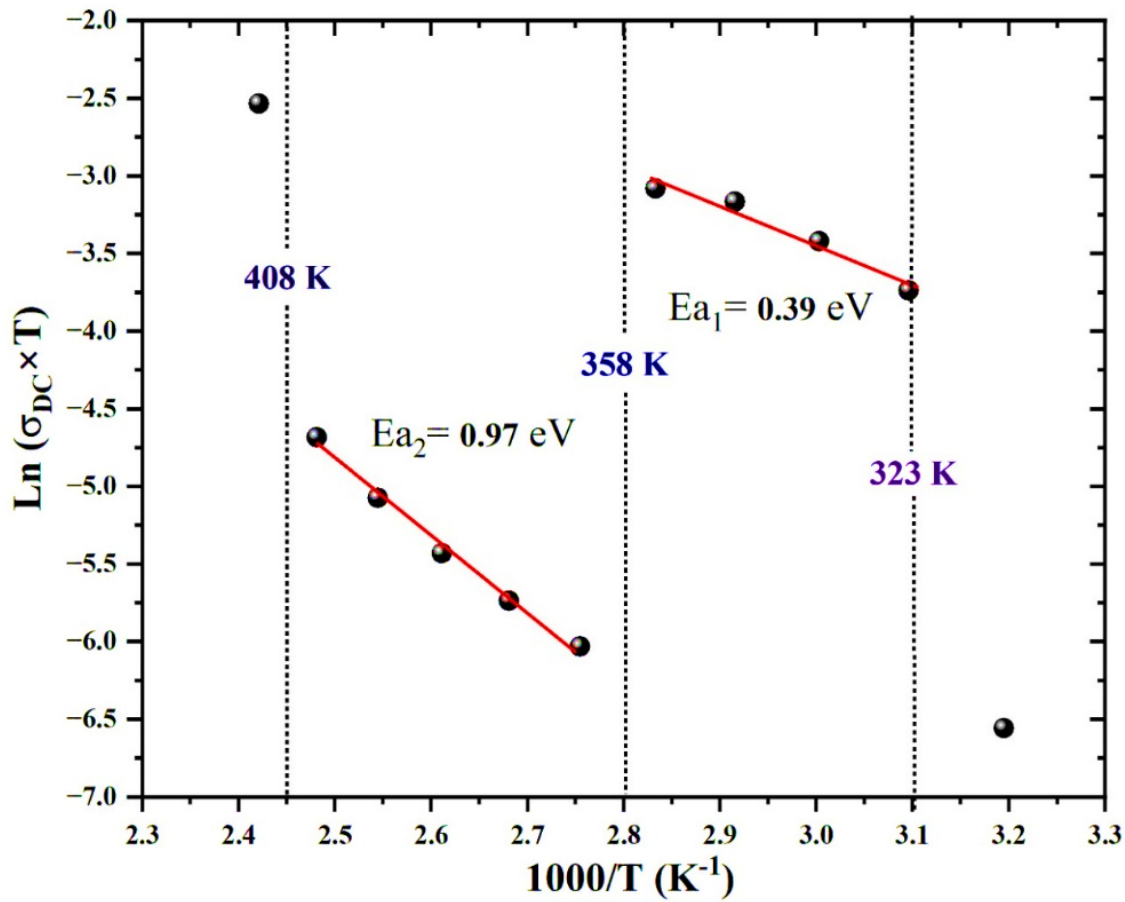

Fig. 6.S: Thermal Activation of Conductivity  $\ln(\sigma \times T) = f(1000/T)$

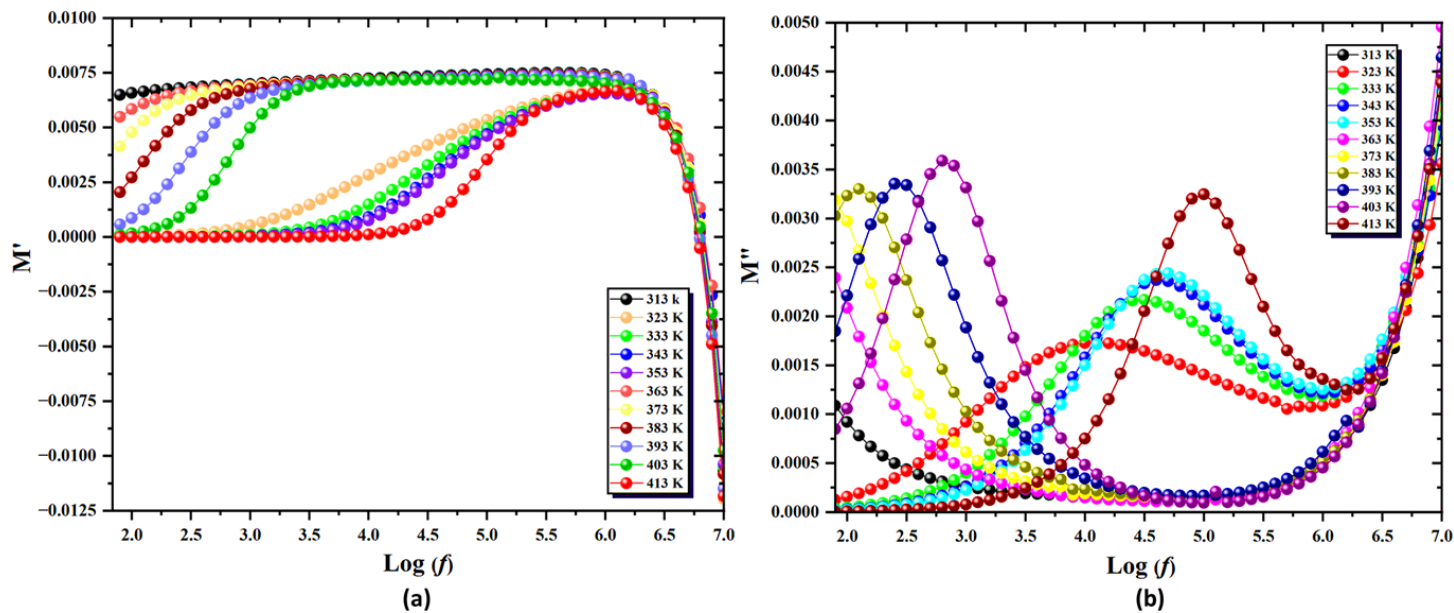

Fig. 7.S: Frequency Dependence of the Complex Electric Modulus: (a) Real Part ( $M'$ ) and (b) Imaginary Part ( $M''$ ) as a Function of  $\log(f)$  at Various Temperatures

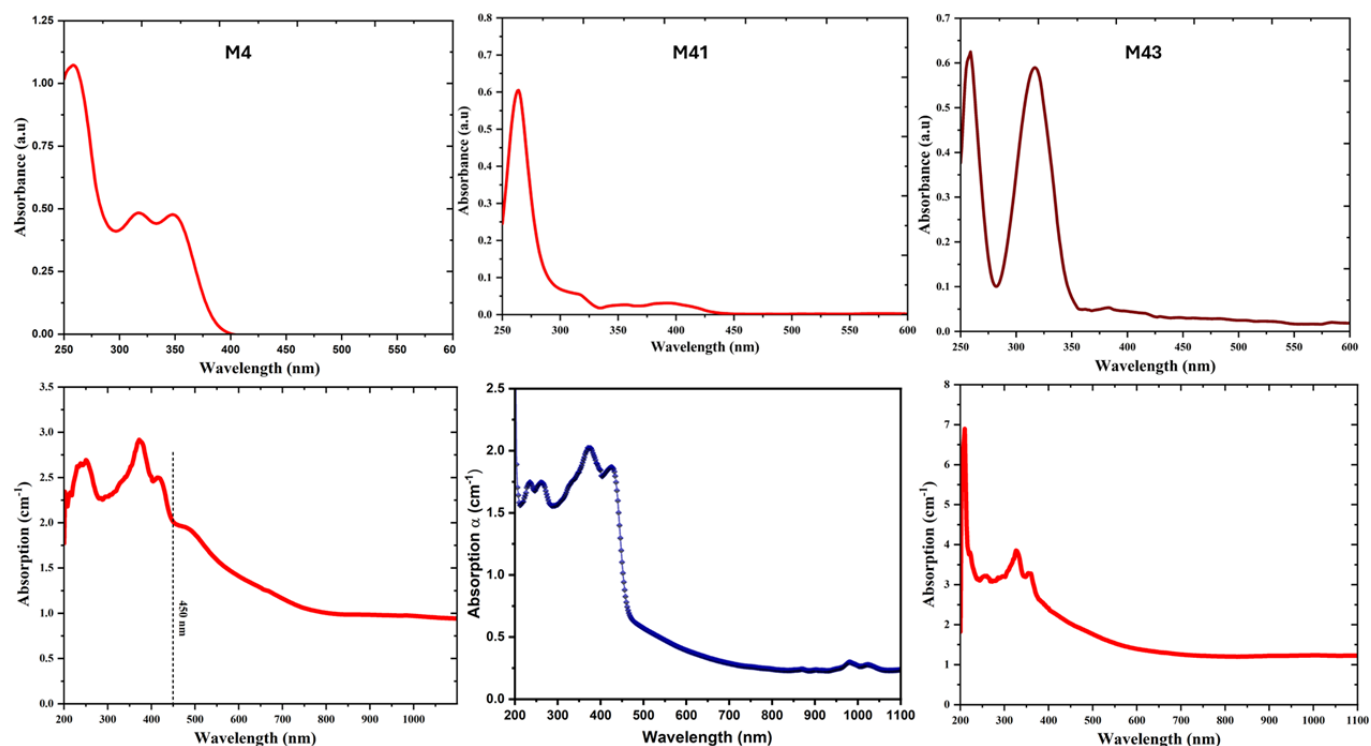

**Fig. 8.S:** Comparative aqueous- and solid-state UV–Vis spectra of the three compounds

**Table 1.S:** Crystallographic and structural features of the three hybrid halometalate compounds

| Feature                     | $(\text{C}_8\text{H}_{14}\text{N}_2)_2[\text{Bi}_2\text{Br}_{10}]\cdot 2\text{H}_2\text{O}$                           | $(\text{C}_8\text{H}_{14}\text{N}_2)[\text{SbCl}_5]$                                               | $(\text{C}_8\text{H}_{14}\text{N}_2)_3[\text{BiCl}_6]_2$                                                                                 |
|-----------------------------|-----------------------------------------------------------------------------------------------------------------------|----------------------------------------------------------------------------------------------------|------------------------------------------------------------------------------------------------------------------------------------------|
| CCDC                        | 2384365                                                                                                               | 2382366                                                                                            | 2432091                                                                                                                                  |
| Space Group                 | Monoclinic $P2_1/c$                                                                                                   | Monoclinic $P2_1/n$                                                                                | Triclinic $P\bar{1}$                                                                                                                     |
| Inorganic Unit              | Dimeric $[\text{Bi}_2\text{Br}_{10}]^{4-}$                                                                            | One Isolated $[\text{SbCl}_5]^{2-}$                                                                | Two Isolated $[\text{BiCl}_6]^{3-}$                                                                                                      |
| Metal Coordination          | $\text{Bi}^{3+}$ : Octahedral with 6 $\text{Br}^-$ (2 bridging)                                                       | $\text{Sb}^{3+}$ : 5-coordinate, square-pyramidal                                                  | $\text{Bi}^{3+}$ : Octahedral with 6 $\text{Cl}^-$                                                                                       |
| Bond Length Range           | $\text{Bi}-\text{Br}$ : 2.7271(5)–3.0612(5) Å                                                                         | $\text{Sb}-\text{Cl}$ : 2.4234(5)–2.9774(5) Å                                                      | $\text{Bi}-\text{Cl}$ : 2.5965(16)–2.8387(17) Å                                                                                          |
| Distortion Cause            | Very small distortion, in the order of $1.7\times 10^{-6}$                                                            | geometry-inert $5s^2$ lone pair on $\text{Sb}^{3+}$ with small distortion ( $4.53\times 10^{-3}$ ) | Somewhat between medium and small distortion ( $2.41\ 10^{-2}$ and $3.58\ 10^{-2}$ ), due to $6s^2$ lone pair effect on $\text{Bi}^{3+}$ |
| Dimensionality              | 0D (discrete dimers)                                                                                                  | 0D (pseudo-polymeric $\text{SbCl}_5$ chains)                                                       | 0D (isolated octahedra)                                                                                                                  |
| Supramolecular Features     | 3D H-bonding with $\text{N}-\text{H}\cdots\text{Br}$ and $\text{O}-\text{H}\cdots\text{Br}$ ; water enhances cohesion | Semi-connected $\text{N}-\text{H}\cdots\text{Cl}$ H-bond network with pseudo-chains                | Dense H-bonding via $\text{N}-\text{H}\cdots\text{Cl}$ ; solvent-free                                                                    |
| Packing Description         | Very Dense network; very compact, includes 2 lattice water molecules                                                  | Dense network, solvent-free, very compact, and efficient packing                                   | Medium, solvent-free, somewhat compact, and efficient packing                                                                            |
| Void Volume                 | 5.9%                                                                                                                  | 7.1%                                                                                               | 10.2%                                                                                                                                    |
| Influence of Metal & Halide | $\text{Bi} + \text{Br} \rightarrow$ the densest, very slightly distorted dimers, enhanced H-bonding                   | $\text{Sb} + \text{Cl} \rightarrow$ slightly distorted, low crystal void                           | $\text{Bi} + \text{Cl} \rightarrow$ somewhat slightly distorted octahedra, low symmetry, medium packing                                  |
| Symmetry vs.                | High symmetry, edge-sharing                                                                                           | High symmetry, distorted                                                                           | Low symmetry, regular octahedra                                                                                                          |

|                  |                    |                |          |
|------------------|--------------------|----------------|----------|
| Geometry         | dimer              | 5-coordination |          |
| H. Bonding Types | N–H...Br, O–H...Br | N–H...Cl       | N–H...Cl |

**Table 2.S:** Comparative antibacterial activity between halometalate hybrids and M41 and the cation

| Compound                                                                                                                 | Method / Dose                  | <i>E. coli</i> (mm) | <i>P. aeruginosa</i> (mm) | Notes                                                                                              |
|--------------------------------------------------------------------------------------------------------------------------|--------------------------------|---------------------|---------------------------|----------------------------------------------------------------------------------------------------|
| (C <sub>6</sub> H <sub>7</sub> NCl) <sub>3</sub> [BiCl <sub>6</sub> ]·H <sub>2</sub> O<br>(Ouerghi et al.) <sup>29</sup> | Disk diffusion, 100<br>μg/disc | ~12 (mm)            | ~9 (mm)                   | Moderate activity; halide<br>identity and lattice<br>compactness limit release.                    |
| (H <sub>2</sub> DDS)[Bi <sub>4</sub> I <sub>16</sub> ] (Ben Ali<br>et al.) <sup>30</sup>                                 | Agar well, 1<br>mg/well        | 11 ± 1.4 (mm)       | 8 (mm)                    | Iodide enhances polarizability,<br>but framework rigidity<br>restrains activity.                   |
| 4-(ethylaminomethyl)<br>pyridine                                                                                         | Agar well, 1<br>mg/well        | 31 (mm)             | 29 (mm)                   | Strong intrinsic antibacterial<br>activity linked to aromatic<br>cation release.                   |
| M41 <sup>19,20</sup>                                                                                                     | Agar well, 1<br>mg/well        | 25–34 (mm)          | 25–34 (mm)                | Synergistic lattice–cation<br>contribution; markedly<br>superior to comparable<br>halobismuthates. |
| Gentamicin (control)                                                                                                     | Agar well, 15<br>μg/well       | 21–30 (mm)          | 21–30 (mm)                | Clinically relevant benchmark;<br>M41 shows competitive or<br>superior efficacy.                   |
